# Supplementary material
Source: Springer Nature journal article supplement (https://www.springermedizin.de/resource/supplementary/12939_2012_330_MOESM3_ESM.pdf/9550972)

A

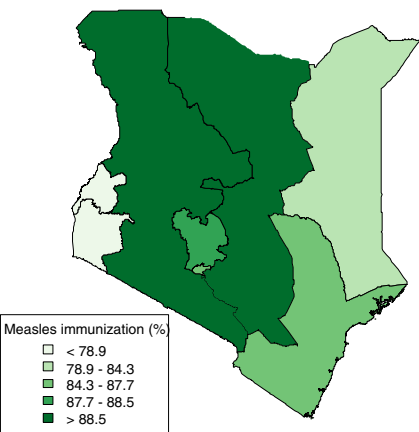

B

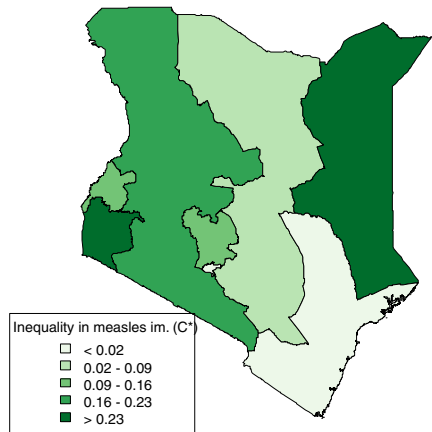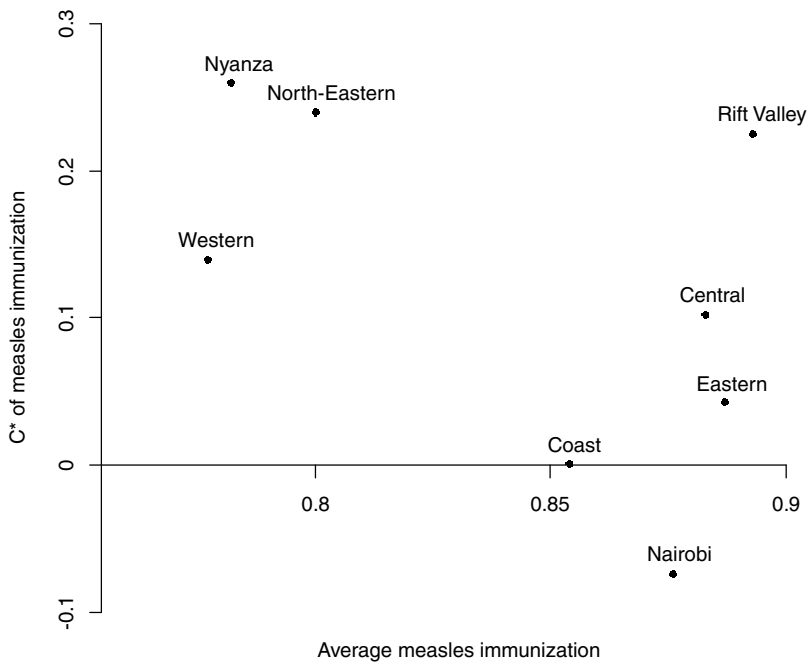

Supplement: MOESM3 [file 9550972]
